# Supplementary material for: Multirecombinant Enterovirus A71 Subgenogroup C1 Isolates Associated with Neurologic Disease, France, 2016–2017
Source: PubMed Central journal article supplement (PMC6537711; doi:10.3201/eid2506.181460), 2019-06
Supplement: 18-1460-Techapp-s1.pdf [file 18-1460-Techapp-s1.pdf]

# Multirecombinant Enterovirus A71 Subgenogroup C1 Isolates Associated with Neurologic Disease, France, 2016–2017

## Appendix

### Materials and Methods

#### Amplification of Gene Sequences and Nucleotide Sequencing of PCR Products

Viral RNA was extracted from patient specimens or cell culture supernatants with the NucliSENS EasyMAG semi-automatic extractor (BioMérieux, <https://www.biomerieux.com>) using specific B protocol. The complete genomes were amplified into 2 amplicons (A, 5' untranslated region [UTR] – 2C; no. 4,500 bp) and (B, 2C – 3' UTR; no. 3,000 bp). cDNA synthesis was performed with SuperScript III reverse transcription (Invitrogen, <https://www.thermofisher.com/us/en/home/brands/invitrogen.html>) using a single primer located within the 2C and the 3' UTR. PCR was performed with Invitrogen Platinum SuperFi PCR Master Mix in 20 µL total volume with 2 µL of cDNA, 10 µL of PCR Master Mix, 6 µL of H<sub>2</sub>O, and 1 µL of each primer (Appendix Table 3). PCR primers are indicated for both amplicons in Appendix Table 3. Gene amplification reactions to obtain the 5' UTR-2C amplicon were performed under the following conditions: 98°C for 30 s, followed by 41 cycles of 98°C for 5 s, 66°C for 10 s, and 72°C for 2 min 20 s, with a final extension step at 72°C for 5 min. To obtain the 2C-3' UTR amplicon, the reaction conditions were 98°C for 30 s, followed by 41 cycles of 98°C for 5 s, 70°C for 10 s, and 72°C for 2 min 25 s, with a final extension step at 72°C for 5 min. PCR products were visualized by 1% agarose gel electrophoresis. Sequencing was performed as previously described (1) with the Big Dye Cycle Sequencing Kit version 3.0 and an ABI 3500Dx automated DNA sequencer (Applied Biosystems, <https://www.thermofisher.com/us/en/home/brands/applied-biosystems.html>).

## **Bayesian Coalescent Analyzes**

Two parameters, evolutionary rate and divergence times, were inferred from the P1 genomic region encoding the 4 capsid proteins and 3D polymerase gene of enterovirus A71 (EV-A71) and EV-A. The sequence data sets were analyzed with a Bayesian Markov chain Monte Carlo algorithm allowing estimation of the posterior distribution of parameters, which is implemented in the BEAST v1.8.4 program (<http://beast.community>) (2). The nucleotide substitution model used was the general time reversible model with 4 gamma rate categories, invariant sites, and partition of the 3 codon positions. A relaxed molecular clock assuming uncorrelated lognormal prior distributions of substitution rates among lineages was used with the Bayesian skyline, which does not assume a specified model of demography (3,4). The analyzes were run for 50 million generations, sampling a tree every 5,000 steps and discarding the first 10% as burn-in. Markov chain Monte Carlo convergence and effective sample sizes were checked using the TRACER v1.6 program (<http://tree.bio.ed.ac.uk/software/tracer>). Analyses were considered to have converged and reached stability after the burn-in period when effective sample sizes were >200. Uncertainty in the estimates was indicated by the 95% highest probability density values. The TreeAnnotator v1.5.4 program (<http://beast.community/>) computed the maximum clade credibility tree from all plausible trees created during the BEAST run, with the first 10% of trees removed as burn-in. The tree was annotated by using FigTree v1.4.3 (<http://tree.bio.ed.ac.uk/software/figtree>).

## **Recombination Detection in Complete Genomes**

The EV-A71 C1v2015 genome sequences were compared with 12 EV-A determined in the present study and 31 genomes selected among those available in international databases. The nucleotide similarity patterns were determined with the SimPlot v3.5.1 program (5) with a sliding window of 200 nt moving in steps of 20 nt. Other methods implemented in RDP v.4.33 (6) (<http://web.cbio.uct.ac.za/~darren/rdp.html>) were used to locate the positions of possible recombination events. The default methods, RDP (7), Geneconv (8), MaxChi (9), Chimaera (10), Bootscan (11), and SiScan (12) were used to survey the sequences. Only putative recombinant signals detected with 5 methods were considered to exclude the possibility of false-positive detection.

## References

1. Hassel C, Mirand A, Farkas A, Diedrich S, Huemer HP, Peigue-Lafeuille H, et al.; HFMD French Study Network. Phylogeography of coxsackievirus A16 reveals global transmission pathways and recent emergence and spread of a recombinant genogroup. *J Virol*. 2017;91:e00630-17. [PubMed](#) <http://dx.doi.org/10.1128/JVI.00630-17>
2. Drummond AJ, Rambaut A. BEAST: Bayesian evolutionary analysis by sampling trees. *BMC Evol Biol*. 2007;7:214. [PubMed](#) <http://dx.doi.org/10.1186/1471-2148-7-214>
3. Drummond AJ, Rambaut A, Shapiro B, Pybus OG. Bayesian coalescent inference of past population dynamics from molecular sequences. *Mol Biol Evol*. 2005;22:1185–92. [PubMed](#) <http://dx.doi.org/10.1093/molbev/msi103>
4. Drummond AJ, Ho SYW, Phillips MJ, Rambaut A. Relaxed phylogenetics and dating with confidence. *PLoS Biol*. 2006;4:e88. [PubMed](#) <http://dx.doi.org/10.1371/journal.pbio.0040088>
5. Lole KS, Bollinger RC, Paranjape RS, Gadkari D, Kulkarni SS, Novak NG, et al. Full-length human immunodeficiency virus type 1 genomes from subtype C-infected seroconverters in India, with evidence of intersubtype recombination. *J Virol*. 1999;73:152–60. [PubMed](#)
6. Heath L, van der Walt E, Varsani A, Martin DP. Recombination patterns in aphthoviruses mirror those found in other picornaviruses. *J Virol*. 2006;80:11827–32. [PubMed](#) <http://dx.doi.org/10.1128/JVI.01100-06>
7. Martin D, Rybicki E. RDP: detection of recombination amongst aligned sequences. *Bioinformatics*. 2000;16:562–3. [PubMed](#) <http://dx.doi.org/10.1093/bioinformatics/16.6.562>
8. Padidam M, Sawyer S, Fauquet CM. Possible emergence of new geminiviruses by frequent recombination. *Virology*. 1999;265:218–25. [PubMed](#) <http://dx.doi.org/10.1006/viro.1999.0056>
9. Smith JM. Analyzing the mosaic structure of genes. *J Mol Evol*. 1992;34:126–9. [PubMed](#) <http://dx.doi.org/10.1007/BF00182389>
10. Posada D, Crandall KA. Evaluation of methods for detecting recombination from DNA sequences: computer simulations. *Proc Natl Acad Sci U S A*. 2001;98:13757–62. [PubMed](#) <http://dx.doi.org/10.1073/pnas.241370698>
11. Martin DP, Posada D, Crandall KA, Williamson C. A modified bootscan algorithm for automated identification of recombinant sequences and recombination breakpoints. *AIDS Res Hum Retroviruses*. 2005;21:98–102. [PubMed](#) <http://dx.doi.org/10.1089/aid.2005.21.98>

12. Gibbs MJ, Armstrong JS, Gibbs AJ. Sister-scanning: a Monte Carlo procedure for assessing signals in recombinant sequences. *Bioinformatics*. 2000;16:573–82. [PubMed](#)  
<http://dx.doi.org/10.1093/bioinformatics/16.7.573>

**Table 1.** Characteristics of patients with EV-A71 C1v2015 infection included in the study\*

| Patient no.† | Specimen no. | Age, y/sex | Care setting (City)     | Clinical diagnosis             | Specimen material       | Collection date | C <sub>t</sub> | Sequence designation  | GenBank accession no.‡ |          |
|--------------|--------------|------------|-------------------------|--------------------------------|-------------------------|-----------------|----------------|-----------------------|------------------------|----------|
| 01           | 01§          | 2.6/F      | Hospital (Toulouse)     | Acute meningitis               | Throat swab             | 2016 May 3      | 25             | 01 TOU148153 FRA 2016 | LR027527               |          |
| 02           | 02           | 0.09/M     | Hospital (Toulouse)     | Fever                          | Nasopharyngeal aspirate | 2016 May 19     | 30             | 02 TOU148165 FRA 2016 |                        |          |
| 02           | 03           | 0.09/M     | Hospital (Toulouse)     | Fever                          | Feces                   | 2016 May 19     | 31             | 02 TOU148166 FRA 2016 |                        |          |
| 03           | 04           | 0.1/M      | Hospital Cochin (Paris) | Fever                          | Plasma                  | 2016 Jun 7      | 37             | 03 COC166142 FRA 2016 |                        |          |
| 04           | 05           | 0.11/F     | Hospital Cochin (Paris) | Fever                          | Plasma                  | 2016 Jun 10     | 32             | 04 COC166146 FRA 2016 |                        |          |
| 05           | 06           | 15.6/F     | Hospital (Bayonne)      | Encephalitis                   | Cerebrospinal fluid     | 2016 Jun 12     | 35             | 05 BAY180005 FRA 2016 |                        |          |
| 05           | 07§          | 15.6/F     | Hospital (Bayonne)      | Encephalitis                   | Throat swab             | 2016 Jun 24     | 35             | 05 BAY180009 FRA 2016 |                        | LR027529 |
| 05           | 08           | 15.6/F     | Hospital (Bayonne)      | Encephalitis                   | Rectal swab             | 2016 Jun 24     | 35             | 05 BAY180095 FRA 2016 |                        |          |
| 06           | 09           | 0.08/M     | Hospital (Toulouse)     | Fever                          | Feces                   | 2016 Jul 10     | 31             | 06 TOU207118 FRA 2016 |                        |          |
| 07           | 10§          | 0.02/M     | Hospital (Toulouse)     | Sepsis-like disease            | Throat swab             | 2016 Aug 10     | 24             | 07 TOU307016 FRA 2016 |                        | LR027521 |
| 07           | 11§          | 0.02/M     | Hospital (Toulouse)     | Sepsis-like disease            | Nasopharyngeal aspirate | 2016 Aug 10     | NR             | 07 TOU307017 FRA 2016 |                        |          |
| 08           | 12§          | 7.6/F      | Hospital Cochin (Paris) | Convulsions                    | Nasopharyngeal aspirate | 2016 Aug 11     | 28             | 08 COC238077 FRA 2016 |                        | LR027528 |
| 09           | 13¶          | 1.93/F     | Ambulatory (Mirecourt)  | HFMD                           | Mouth swab              | 2016 Aug 30     | 32             | 09 PMB250101 FRA 2016 |                        | LR027523 |
| 10           | 14§          | 1.39/M     | Ambulatory (Mirecourt)  | HFMD                           | Throat swab             | 2016 Aug 30     | 29             | 10 PMB250102 FRA 2016 |                        | LR027524 |
| 11           | 15§          | 0.11/M     | Hospital Cochin (Paris) | Fever, hypotonia               | Blood                   | 2016 Sep 5      | 30             | 11 COC259064 FRA 2016 |                        | LR027525 |
| 12           | 16¶          | 0.03/M     | Hospital (Toulouse)     | Acute meningitis, HFMD         | Throat swab             | 2016 Sep 7      | 33             | 12 TOU307023 FRA 2016 |                        | LR027526 |
| 13           | 17§          | 1.37/M     | Ambulatory (Toulouse)   | HFMD                           | Mouth swab              | 2016 Sep 14     | 29             | 13 PMB263109 FRA 2016 |                        | LR027534 |
| 14           | 18§          | 0.18/F     | Hospital Cochin (Paris) | Fever                          | Feces                   | 2016 Sep 27     | 20             | 14 COC286037 FRA 2016 |                        | LR027533 |
| 15           | 19§          | 1.77/F     | Daycare (Volvic)        | None reported                  | Feces                   | 2016 Oct 4      | 29             | 15 VSV286030 FRA 2016 |                        | LR027530 |
| 16           | 20§          | 1.39/M     | Daycare (Volvic)        | None reported                  | Feces                   | 2016 Oct 4      | 31             | 16 VSV286032 FRA 2016 |                        | LR027536 |
| 17           | 21§          | 1.69/M     | Daycare (Volvic)        | None reported                  | Feces                   | 2016 Oct 4      | 31             | 17 VSV286034 FRA 2016 |                        | LR027537 |
| 18           | 22§          | 2.38/F     | Daycare (Volvic)        | None reported                  | Feces                   | 2016 Oct 4      | 29             | 18 VSV286035 FRA 2016 |                        | LR027535 |
| 19           | 23§          | 2.05/M     | Daycare (Volvic)        | None reported                  | Feces                   | 2016 Oct 4      | 31             | 19 VSV286036 FRA 2016 |                        | LR027538 |
| 20           | 24           | 0.08/M     | Hospital (Toulouse)     | Sepsis-like disease            | Throat swab             | 2016 Oct 5      | 33             | 20 TOU307031 FRA 2016 |                        |          |
| 21           | 25           | 0.04/M     | Hospital (Versailles)   | Diarrhea                       | Cerebrospinal fluid     | 2016 Oct 9      | 35             | 21 VER294019 FRA 2016 |                        |          |
| 22           | 26           | 14.7/M     | Hospital (Toulouse)     | Acute meningitis, cerebellitis | Throat swab             | 2016 Oct 10     | 36             | 22 TOU307034 FRA 2016 |                        |          |
| 22           | 27           | 14.7/M     | Hospital (Toulouse)     | Acute meningitis, cerebellitis | Feces                   | 2016 Oct 10     | 30             | 22 TOU307035 FRA 2016 |                        |          |
| 23           | 28§          | 0.25/F     | Hospital (Toulouse)     | Fever                          | Throat swab             | 2016 Oct 11     | 27             | 23 TOU307036 FRA 2016 | LR027532               |          |
| 23           | 29           | 0.25/F     | Hospital (Toulouse)     | Fever                          | Feces                   | 2016 Oct 12     | 29             | 23 TOU307037 FRA 2016 |                        |          |
| 24           | 30§          | 5/M        | Hospital (Amiens)       | Myelitis                       | Nasopharyngeal swab     | 2016 Oct 18     | 30             | 24 AMI302002 FRA 2016 | LR027546               |          |
| 24           | 31§          | 5/M        | Hospital (Amiens)       | Myelitis                       | Feces                   | 2016 Oct 20     | 33             | 24 AMI302001 FRA 2016 | LR027531               |          |
| 25           | 32§          | 0.92/F     | Ambulatory (Montesson)  | Atypical HFMD, herpangina      | Throat swab             | 2017 Jul 3      | 22             | 25 PMB501259 FRA 2017 | LR027539               |          |

\*C<sub>t</sub>, cycle threshold; EV-A71, enterovirus type A71; HFMD, hand, foot and mouth disease; NR, not reported.

†Patients 15–19 were children in the same day care facility, who had no evidence of clinical disease.

‡Virus genomes were not determined in 12 clinical specimens because gene amplifications were unsuccessful.

§Specimens for which the complete viral genomes (including the full 5' and 3' untranslated regions) were determined.

¶Specimens for which partial genomes were determined.

**Table 2.** Genomes of virus isolates determined from cell culture supernatants to investigate their genetic relationships with the EV-A71 C1v2015\*

| Sample no. | Sample designation | Collection year | Clinical specimen | Country (city)            | Enterovirus type   subgenogroup | GenBank accession nos., earlier partial sequence data | GenBank accession no., this study |
|------------|--------------------|-----------------|-------------------|---------------------------|---------------------------------|-------------------------------------------------------|-----------------------------------|
| 1          | CF097017 FRA 2003  | 2003            | Stool             | France (Clermont-Ferrand) | EV-A71   C1                     | HG934182.1                                            | LR027544.1                        |
| 2          | STU562356 DEU 2003 | 2003            | Unknown           | Germany (Stuttgart)       | EV-A71   C1                     | HG934192.1                                            | LR027542.1                        |
| 3          | 1480 NLD 2005      | 2005            | Unknown           | Netherlands (Eindhoven)   | EV-A71   C1                     | AB524174.1                                            | LR027541.1                        |
| 4          | CF210042 FRA 2006  | 2006            | Pharynx           | France (Clermont-Ferrand) | EV-A71   C1                     | HG934219.1                                            | LR027547.1                        |
| 5          | GRE29 FRA 2007     | 2007            | Pharynx           | France (Grenoble)         | EV-A71   C1                     | HG934229.1                                            | LR027545.1                        |
| 6          | STU546711 DEU 2008 | 2008            | Stool             | Germany (Stuttgart)       | EV-A71   C1                     | HG934246.1                                            | LR027543.1                        |
| 7          | 37183 TKM 2010     | 2010            | Stool             | Turkmenistan              | CV-A7                           | KC879521.1,<br>KC879366.1,<br>KC879445.1              | LR027540.1                        |
| 8          | 41963 RUS 2011     | 2011            | Stool             | Russia                    | CV-A2                           | KC879551.1,<br>KC879399.1,<br>KC879478.1              | LR027549.1                        |
| 9          | 42115 RUS 2011     | 2011            | Stool             | Russia                    | CV-A2                           | KC879553.1,<br>KC879401.1,<br>KC879480.1              | LR027551.1                        |
| 10         | 41149 RUS 2011     | 2011            | Stool             | Russia                    | CV-A2                           | KC879544.1,<br>KC879390.1,<br>KC879469.1              | LR027550.1                        |
| 11         | 41143 RUS 2011     | 2011            | Stool             | Russia                    | CV-A5                           | KC879543.1,<br>KC879389.1,<br>KC879468.1              | LR027548.1                        |
| 12         | 40428 TKM 2011     | 2011            | Stool             | Turkmenistan              | CV-A6                           | KC879540.1,<br>KC879386.1,<br>KC879465.1              | LR027552.1                        |

\*EV-A71, enterovirus A71.

**Appendix Table 3.** Primers used in this study for gene amplification and amplicon sequencing\*

| Genomic region† | Primer designation‡  | Sequence (5'→3')                   | Location§   | Use           |
|-----------------|----------------------|------------------------------------|-------------|---------------|
| 5' UTR to 2C    | A.F                  | TAAACAGCCTGTGGGTTG                 | 2–20        | Amplification |
|                 | A.R                  | CATGCAGTTCAAGAGCAARCACCG           | 4,409–4,432 | Amplification |
|                 | A.F.1                | GACGTCCGGCCCCTGAATGCGGCTAATCC      | 447–475     | Sequencing    |
|                 | A.R.1                | GCGGAACCGACTACTTTGGGTGTCCGGAATTC   | 536–567     | Sequencing    |
|                 | A.F.2                | TGGCTATGGTGAGTGGCC                 | 1,049–1,066 | Sequencing    |
|                 | A.R.2                | GCTAGTGACGAGAGTATG                 | 2,610–2,627 | Sequencing    |
|                 | A.F.3                | GTCAGATCCCCAGCACAGG                | 2,987–3,006 | Sequencing    |
|                 | A.R.3                | GTCAGATCCCCAGCACAGG                | 2,987–3,006 | Sequencing    |
|                 | A.F.4                | GGATACCTCGCCCGATGCGC               | 3,220–3,239 | Sequencing    |
|                 | A.R.4                | GCYCAAGGHTGYGACACGATWGCTC          | 3,468–3,492 | Sequencing    |
| A.F.5           | TCATTGATTGGCTCAAGGAG | 4,159–4,178                        | Sequencing  |               |
| 2C to 3' UTR    | B.F                  | CATGCAGTTCAAGAGCAARCACCG           | 4,409–4,432 | Amplification |
|                 | B.R                  | GTGGGGGTAATTTGTTATAACCAGAATAGC     | 7,378–7,408 | Amplification |
|                 | B.F.1                | GTGTGTGGCAAGGCCATTAG               | 4,929–4,949 | Sequencing    |
|                 | B.R.1                | GTGTGTGGCAAGGCCATTAG               | 4,929–4,949 | Sequencing    |
|                 | B.R.2                | GTGATCAACACAGAGCACATGCC            | 5,694–5,716 | Sequencing    |
|                 | B.F.2                | CCRACCCGCACTAARCTTGARCCAG          | 5,994–6,019 | Sequencing    |
|                 | B.F.3                | GGCCTTGACCTYCCYACTCYAC             | 6,381–6,403 | Sequencing    |
|                 | B.R.3                | GGCCTTGACCTYCCYACTCYAC             | 6,381–6,403 | Sequencing    |
|                 | B.R.4                | GGAGYAARYTACCRATYCTACTCCAGGATCGCTC | 6,589–6,623 | Sequencing    |
|                 | B.F.4                | CGGTGGACTAAGGACGCACGCAAC           | 7,143–7,166 | Sequencing    |

\*UTR, untranslated region.

†A schematic of gene organization of the enterovirus genome is shown in Figure 2 (main text).

‡A.F and A.R: primers used for gene amplification of the 5' UTR-2C region. A.F.1–5, forward primers and A.R.1–4, reverse primers used for sequencing the 5' UTR-2C amplicon. B.F and B.R: primers used for amplification of the 2C-3' UTR region. B.F.1–4, forward primers and B.R.1–4, reverse primers used for sequencing the 2C-3' UTR amplicon.

§The location of primers indicates nucleotide positions in the genome of the enterovirus A71 BrCr prototype strain (GenBank accession no. U22521.1).

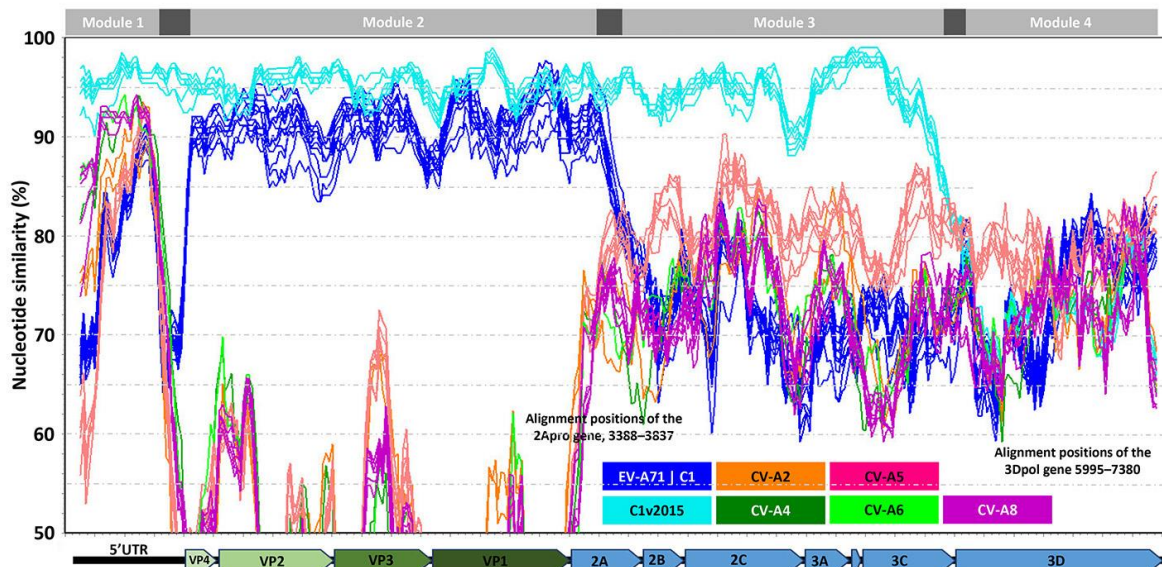

**Appendix Figure 1.** Nucleotide similarity plots determined for the EV-A71 C1v2015 genome 14|COC286037|FRA|2016 as query (patient 14, infant fever, stool specimen, collection year 2016). The nucleotide similarity was calculated by the sliding window method (window of 200 nucleotides moving every 20 nucleotides). The similarity plots determined for the other C1v2015 genomes were similar. The different enterovirus types and lineages selected for the analysis are color-coded. The mean genetic distance between the C1v2015 and C1 viruses, calculated with the P1 sequences, was <9% nucleotide differences. A schematic diagram of the enterovirus genome is shown at the bottom of the figure. Four genomic modules with different genetic origins were identified as indicated. The 99% confidence intervals (CIs) of the nucleotide boundaries assessed for the genomic modules (indicated in dark gray) were determined as described in Hassel et al. (1). The 3' boundary of module 1 and the 5' end of module 2 were located within a segment at the end of the 5' UTR but were not determined precisely. The 3' boundary of module 2 was located between alignment positions 3,532 and 3,722. The 5' boundary of module 4 was assessed at the end of 3Cpro gene (alignment positions 5,968–6,044). EV-A71, enterovirus A71; UTR, untranslated region.

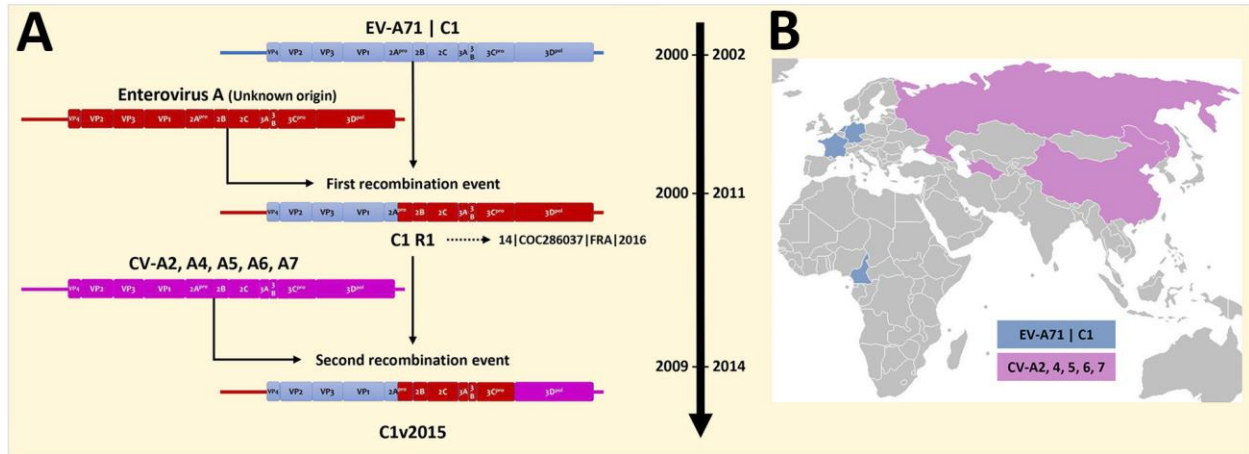

**Appendix Figure 2.** Scenario of the possible origin and evolution of EV-A71 C1v2015. A) Sequential recombination events that drove emergence of C1v2015. B) Geographic distribution of current gene pools from which the C1v2015 genome was derived: capsid protein genes, countries colored in blue; 3Dpol gene, countries colored in purple. CV-A, coxsackievirus A; EV-A71, enterovirus A71; VP, viral protein.
